# Supplementary material
Source: Springer Nature journal article supplement (https://www.springermedizin.de/resource/supplementary/12974_2011_486_MOESM1_ESM.pdf/9601398)

PDT

42s

20s

10s

day7

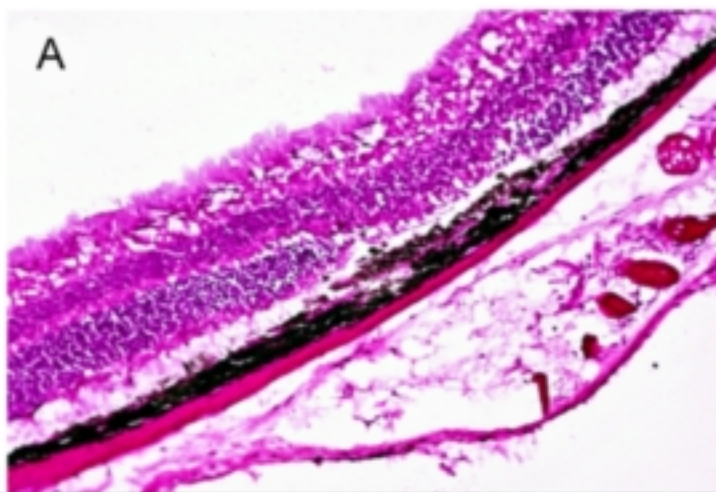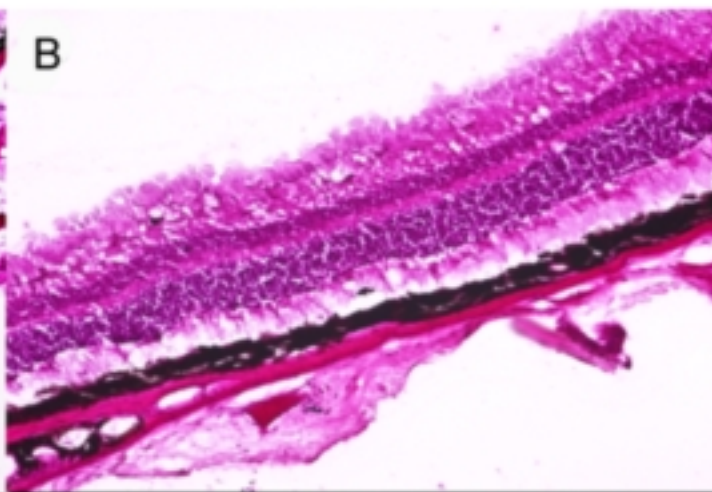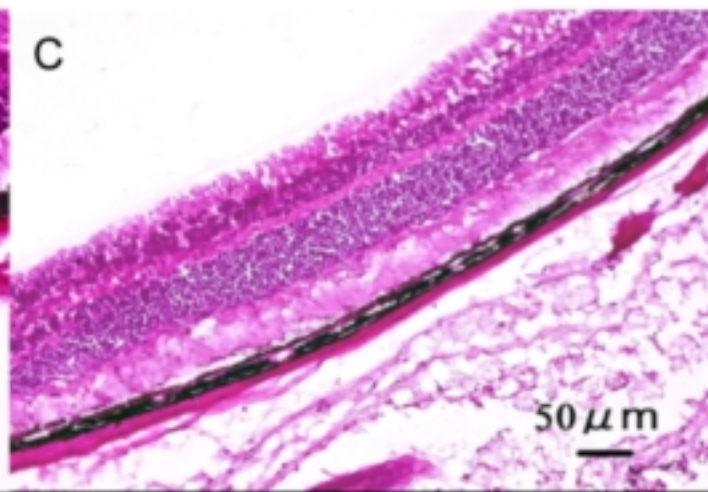

day3

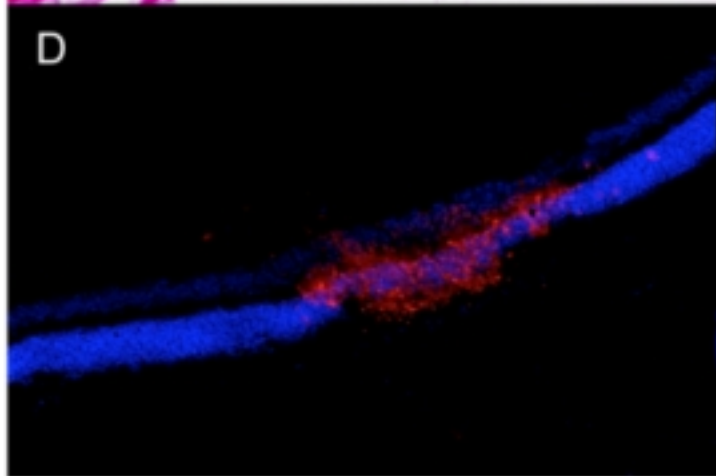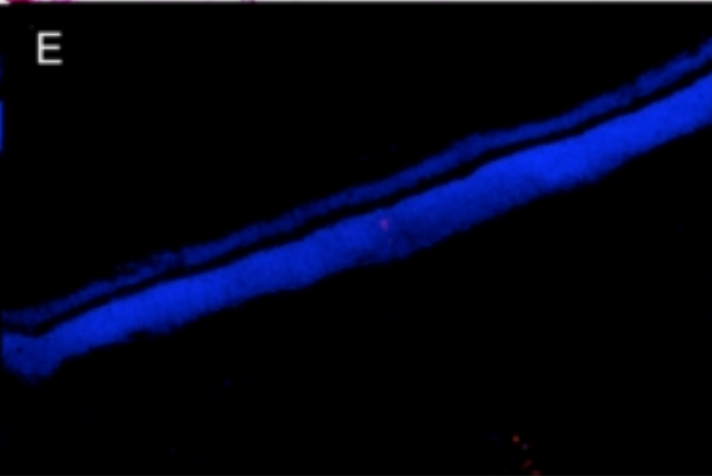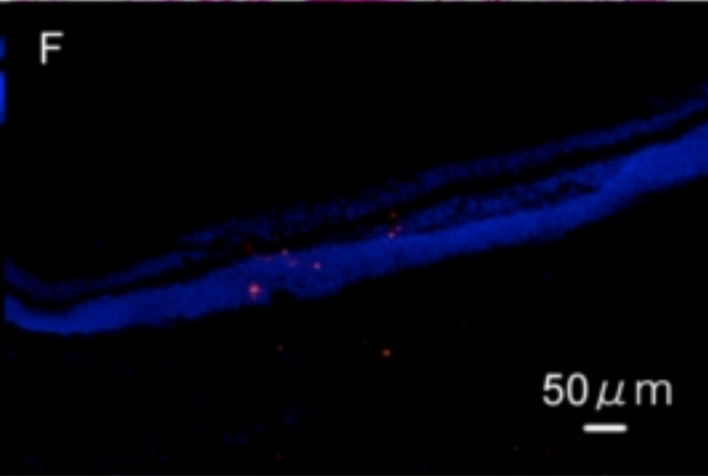

G

(cells)

\*\*

\*\*

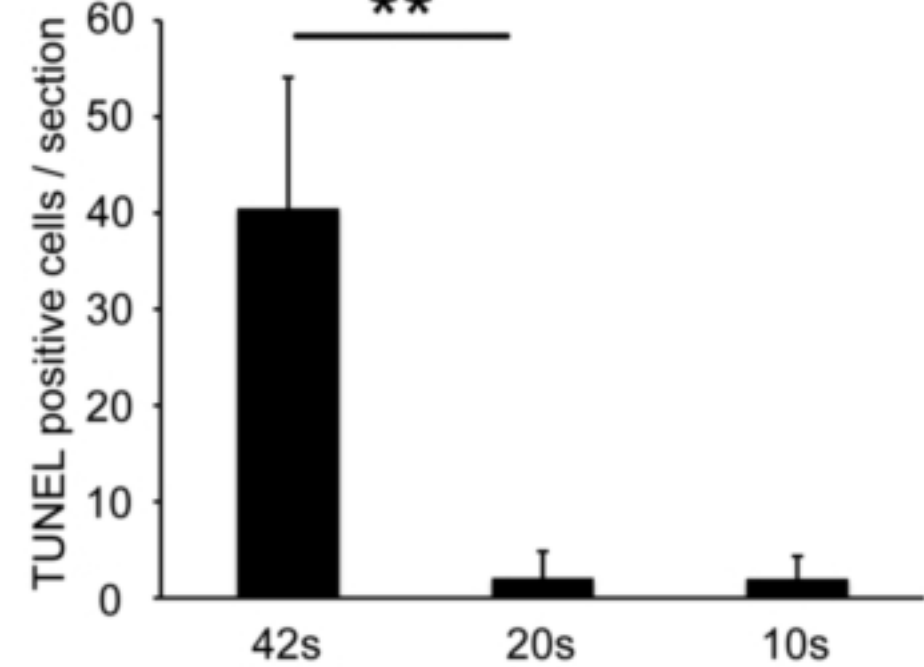

Supplement: MOESM1 [file 9601398]
